# Supplementary material for: Phosphorylation of Phylogenetically Conserved Amino Acid Residues Confines HBx within Different Cell Compartments of Human Hepatocarcinoma Cells
Source: MDPI journal article supplement (doi:10.3390/molecules26051254), 2021-02-26
Supplement: s1 [file s1]

**Table S1. PCR primers used for site directed mutagenesis**

| Name     | Construct | Direction | 5'-3' Sequence <sup>a</sup>                  |
|----------|-----------|-----------|----------------------------------------------|
| HBx-S25A | S25A      | Forward   | 5'-TCCCGTCAGCGCTGAAGCCTGCGGACGATCCCTCTCG-3'  |
| HBx-S25A | S25A      | Reverse   | 5'-CGAGAGGGATCGTCCGCAGGCTTCAGCGCTGACGGGA-3'  |
| HBx-S25D | S25D      | Forward   | 5'-TCCCGTCAGCGCTGAAGACTGCGGACGATCCCTCTCG-3'  |
| HBx-S25D | S25D      | Reverse   | 5'-CGAGAGGGATCGTCCGCAGTCTTCAGCGCTGACGGGA-3'  |
| HBx-S41A | S41A      | Forward   | 5'-GGGCTGTATCGCCCCCTGCGCCGTCTGCCGTTCCAGC-3'  |
| HBx-S41A | S41A      | Reverse   | 5'-GCTGGAACGGCAGACGGCGCAGGGGGCGATACAGCCC-3'  |
| HBx-S41D | S41D      | Forward   | 5'-GGGCTGTATCGCCCCCTGATCCGTCTGCCGTTCCAGC-3'  |
| HBx-S41D | S41D      | Reverse   | 5'-GCTGGAACGGCAGACGGATCAGGGGGCGATACAGCCC-3'  |
| HBx-T81A | T81A      | Forward   | 5'-TCTGCACTCGCATGGAGGCCACCGTGACCGCCCCTCG-3'  |
| HBx-T81A | T81A      | Reverse   | 5'-CGAGGGGCGTTACGGTGGCTCCATGCGACGTGCAGA-3'   |
| HBx-T81D | T81D      | Forward   | 5'-TCTGCACGTGCGATGGAGGACACCGTGACCGCCCCTCG-3' |
| HBx-T81D | T81D      | Reverse   | 5'-CGAGGGGCGTTACGGTGTCTCCATCGACGTGCAGA-3'    |

<sup>a</sup> Bold and underlined, mutagenized nucleotide(s).

**Table S2. PCR primers used for cloning in expression vectors**

| Construct (Vector)           | Direction | 5'-3' Sequence <sup>a</sup>                      | Restriction Site |
|------------------------------|-----------|--------------------------------------------------|------------------|
| 3xFLAG-HBx (pcDNA3.1-3XFLAG) | Forward   | 5'-GATCGATCGATCAAGCTTATGGCTGCTCGGTTGTGCTG-3'     | HindIII          |
|                              | Reverse   | 5'-GATCGATCGATCGAATTCCTAGGCAGAGGTGAAAAAGTTG-3'   | EcoRI            |
| HBx-GFP (pAcGFP)             | Forward   | 5'-GATCGATCGATCAAGCTTATGGCTGCTCGGTTGTGCTG-3'     | HindIII          |
|                              | Reverse   | 5'-GATCGATCGATCCGGTACCGTGGCAGAGGTGAAAAAGTTGCA-3' | KpnI             |

<sup>a</sup> Bold and underlined, restriction site.
